# Supplementary material for: The Vienna LTE simulators - Enabling reproducibility in wireless communications research
Source: Springer Nature journal article supplement (doi:10.1186/1687-6180-2011-29), 2011-07-25

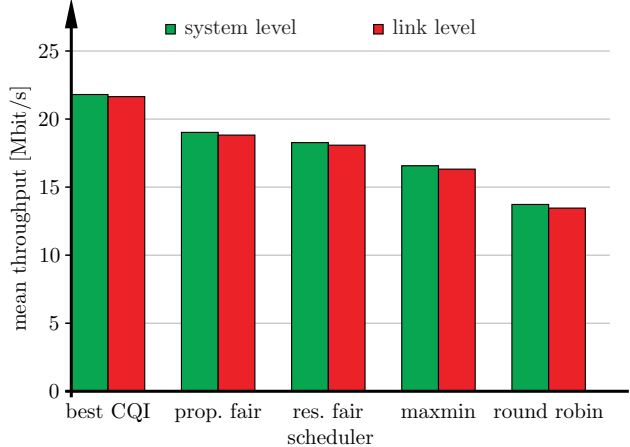

Supplement: 13634_2010_26_MOESM11_ESM.pdf [file 13634_2010_26_MOESM11_ESM.pdf]
